# Supplementary material for: Single-crystal field-effect transistors of a highly dipolar merocyanine dye
Source: Royal Society of Chemistry journal article supplement (doi:10.1039/c5mh00167f), 2015-11-16
Supplement: c5mh00167f1.pdf [file c5mh00167f1.pdf]

## Supporting Information

### Single crystal field-effect transistors of a highly dipolar merocyanine dye

Andreas Liess, Matthias Stolte, Tao He and Frank Würthner\*

Universität Würzburg, Institut für Organische Chemie & Center for Nanosystems Chemistry,  
Am Hubland, 97074 Würzburg, Germany.

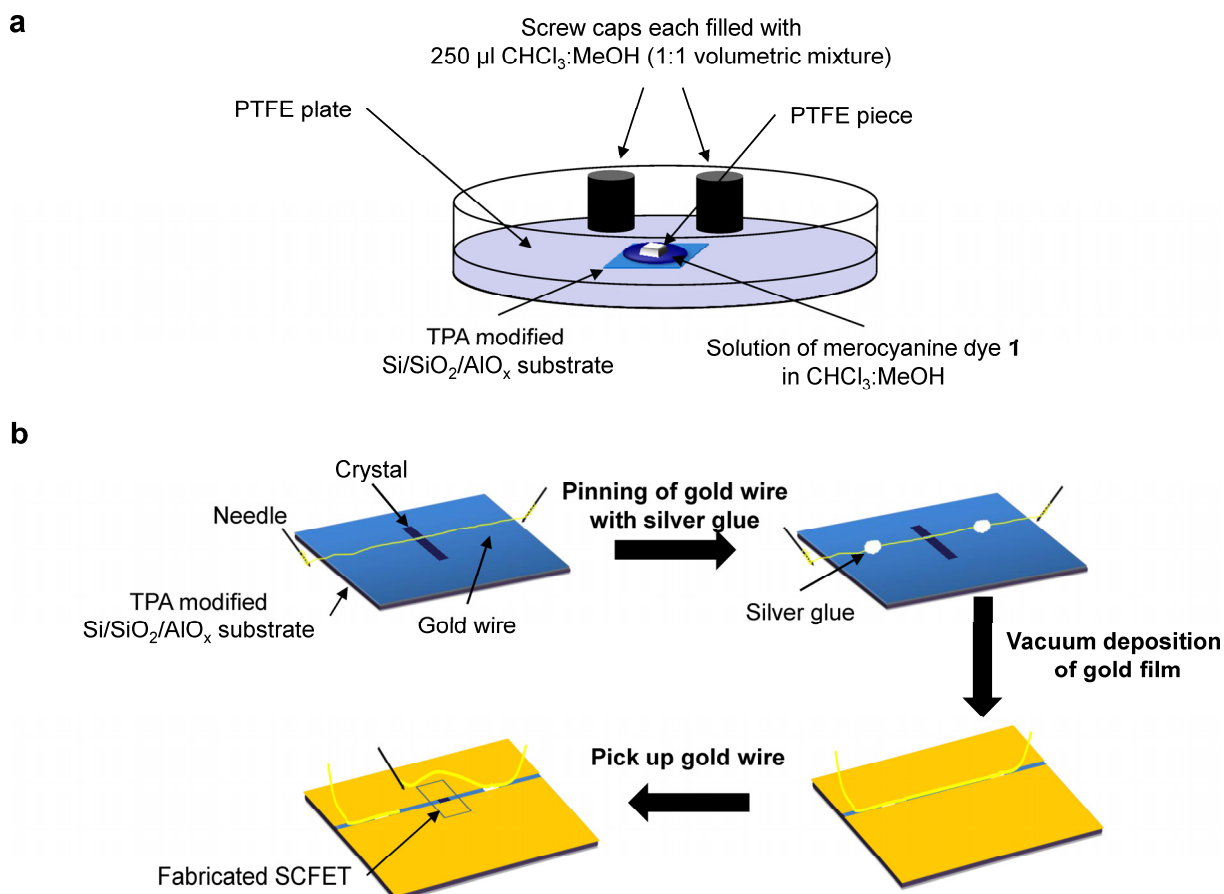

**Fig. S1.** (a) Schematic drawing of crystal growth procedure on TPA modified  $\text{Si/SiO}_2/\text{AlO}_x$  substrate. (b) Schematic drawing of fabrication of gold source and drain electrodes onto a grown single crystal.

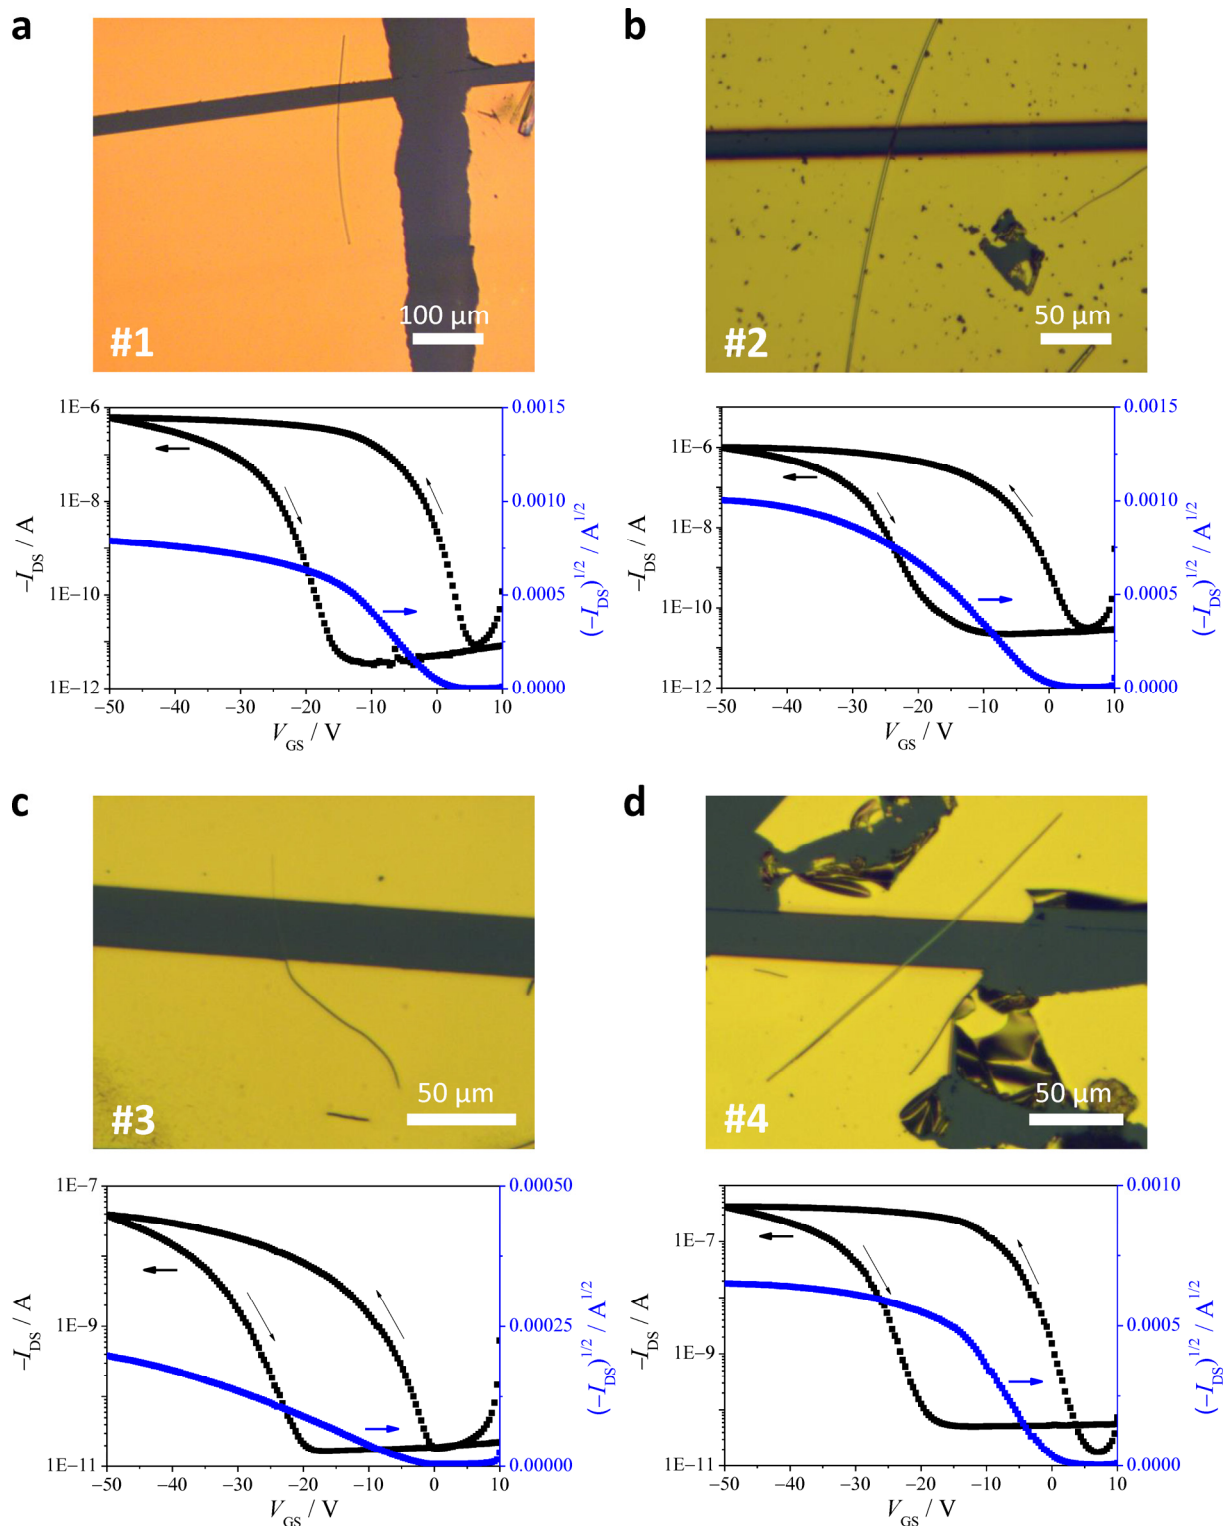

**Fig. S2.** Optical microscopy images and corresponding transfer characteristics of SCFET devices #1 (a), #2 (b), #3 (c) and #4 (d).

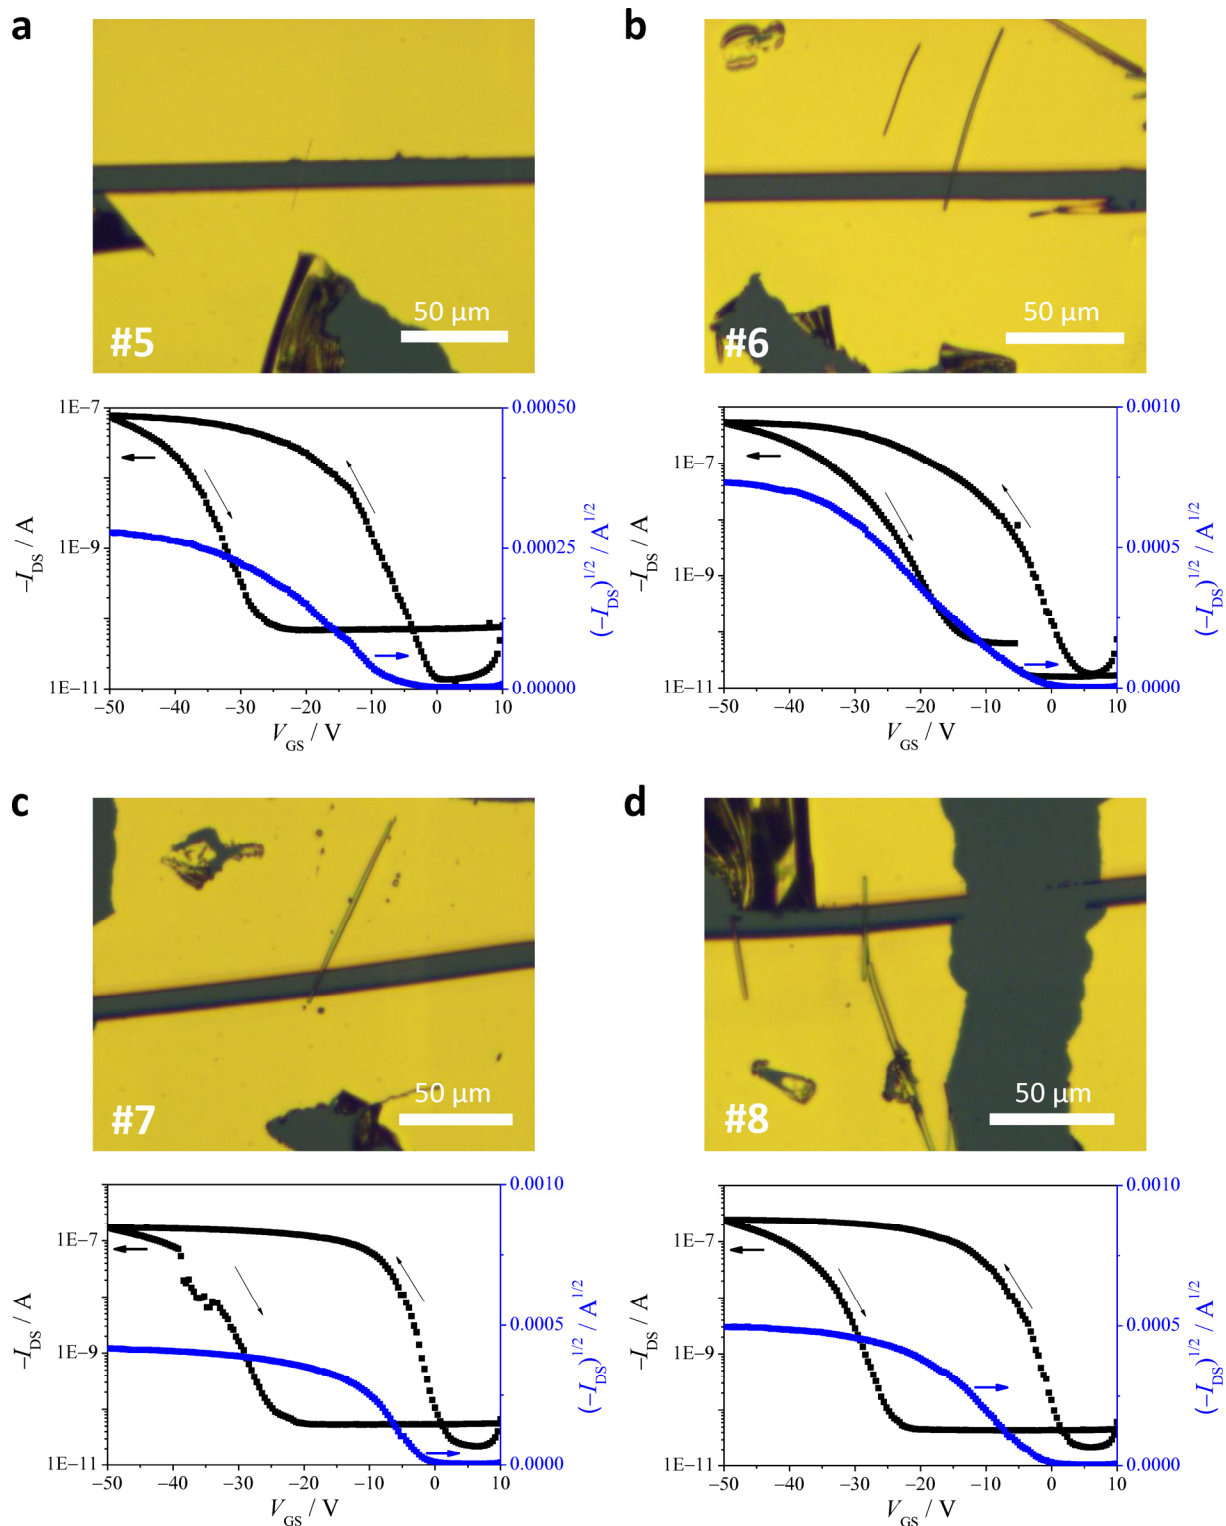

**Fig. S3.** Optical microscopy images and corresponding transfer characteristics of SCFET devices #5 (a), #6 (b), #7 (c) and #8 (d).

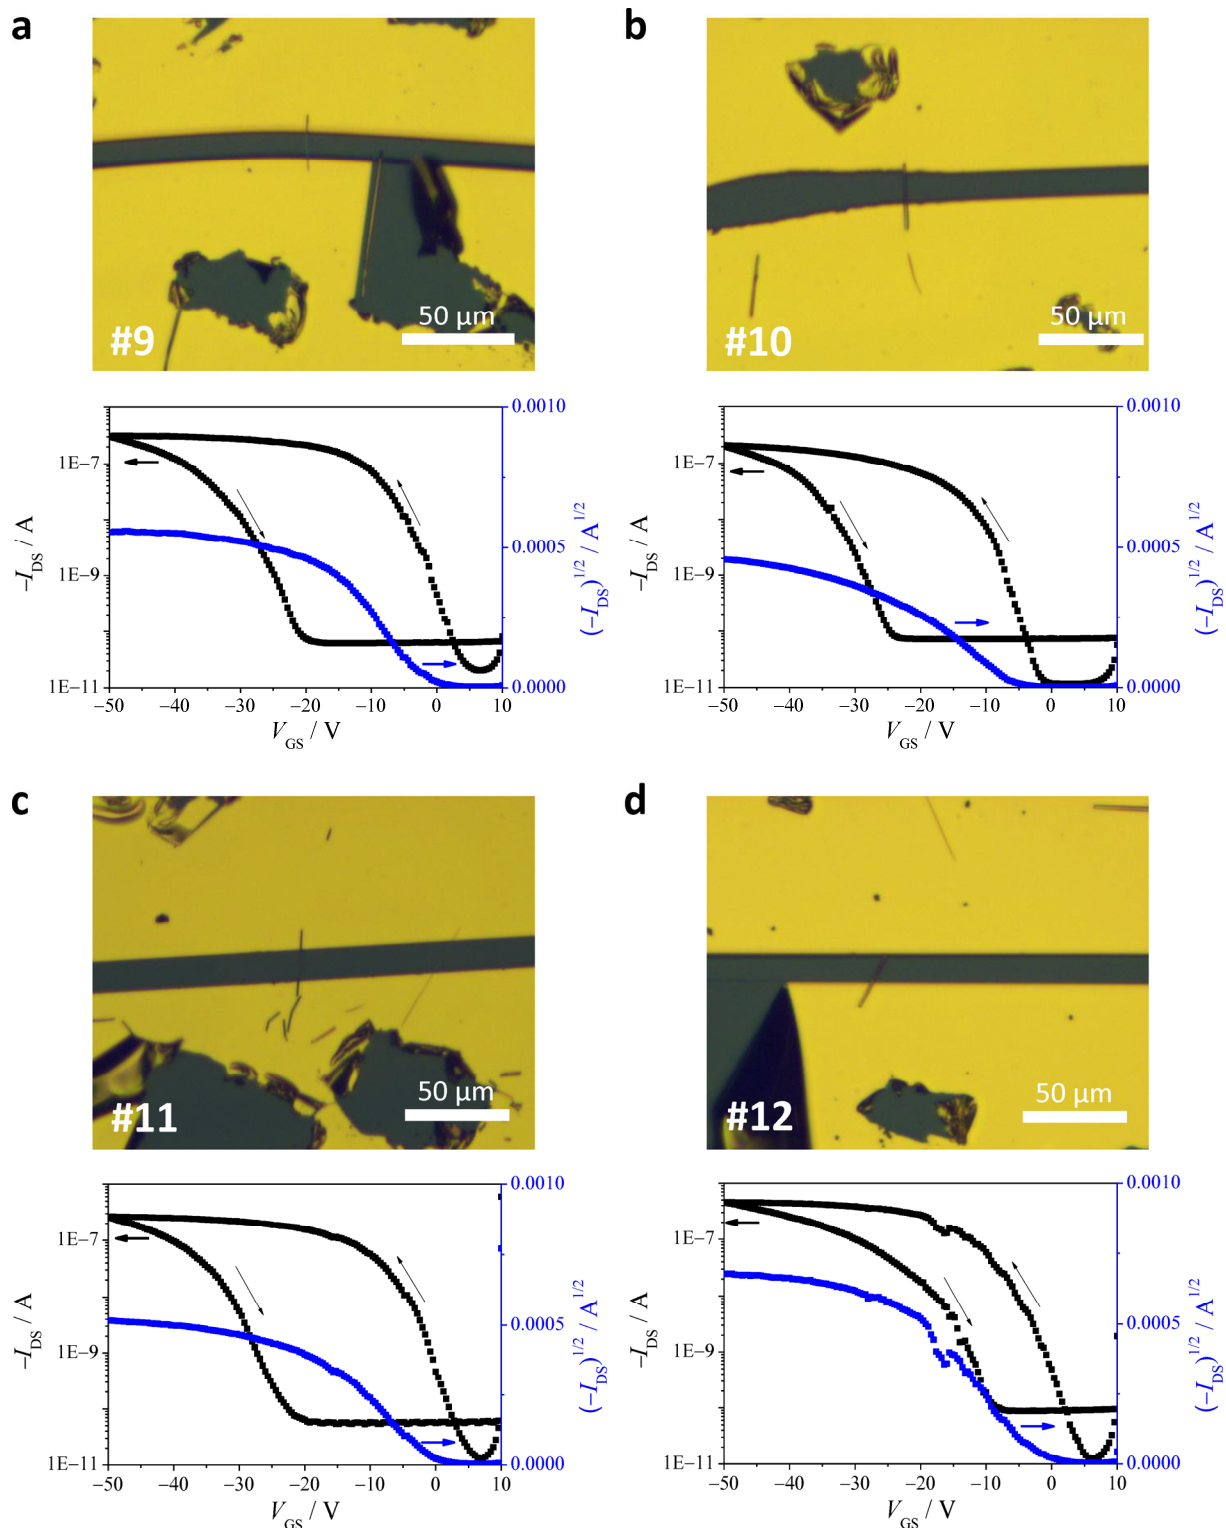

**Fig. S4.** Optical microscopy images and corresponding transfer characteristics of SCFET devices #9 (a), #10 (b), #11 (c) and #12 (d).

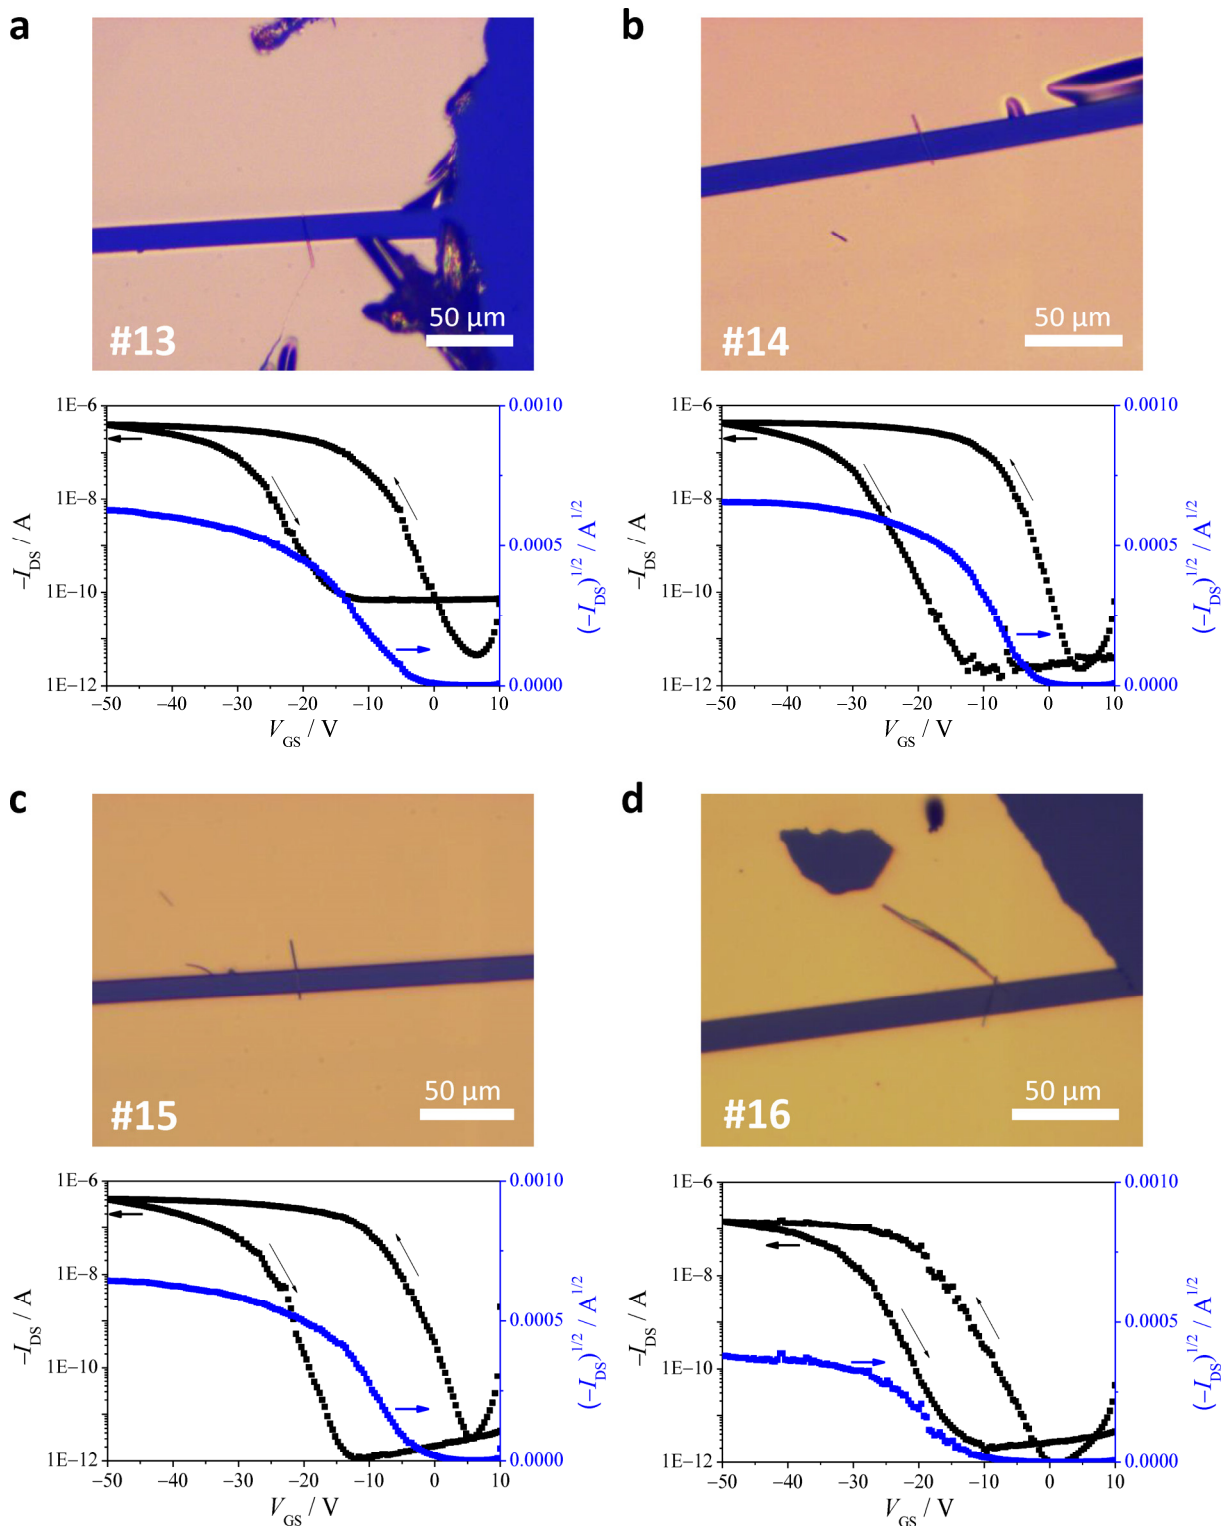

**Fig. S5.** Optical microscopy images and corresponding transfer characteristics of SCFET devices #13 (a), #14 (b), #15 (c) and #16 (d).



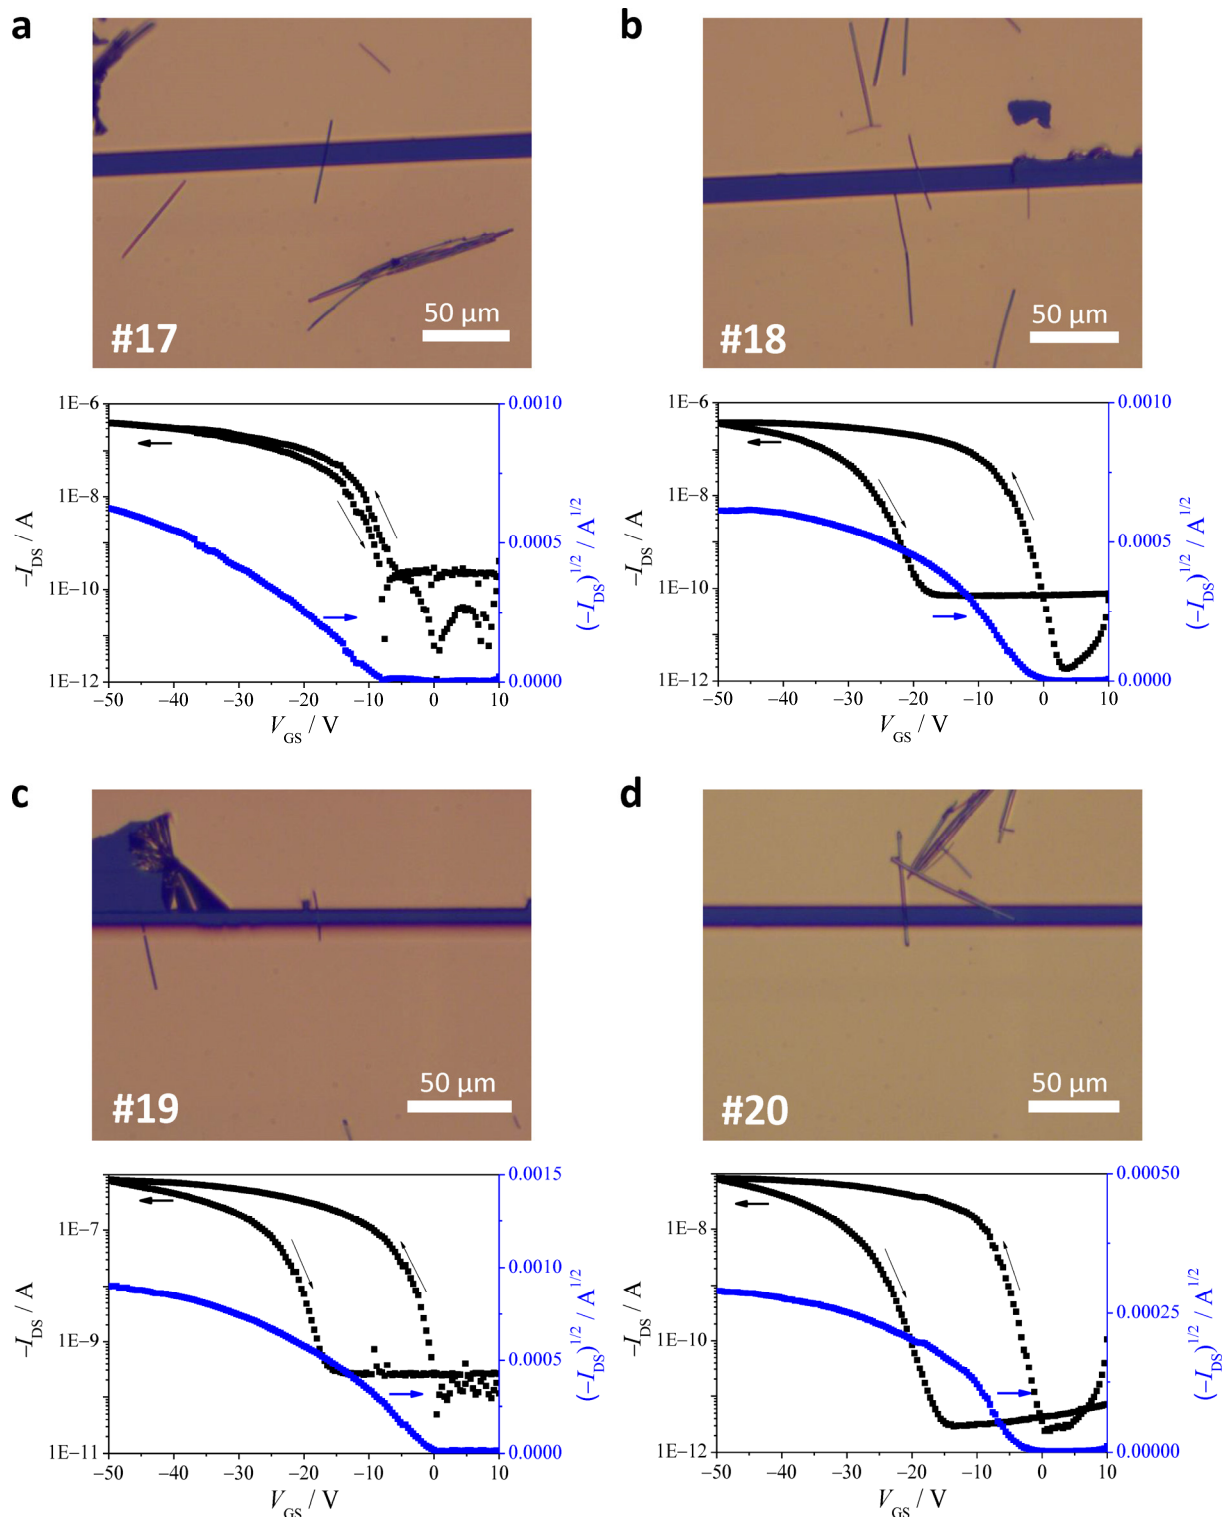

**Fig. S6.** Optical microscopy images and corresponding transfer characteristics of SCFET devices #17 (a), #18 (b), #19 (c) and #20 (d).

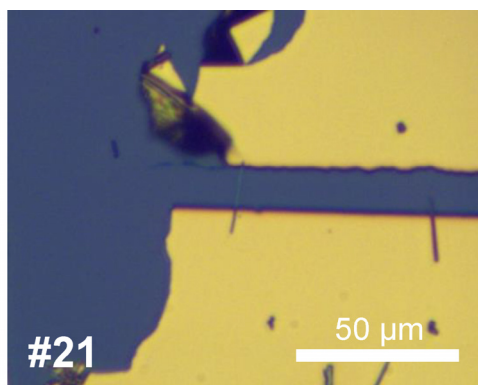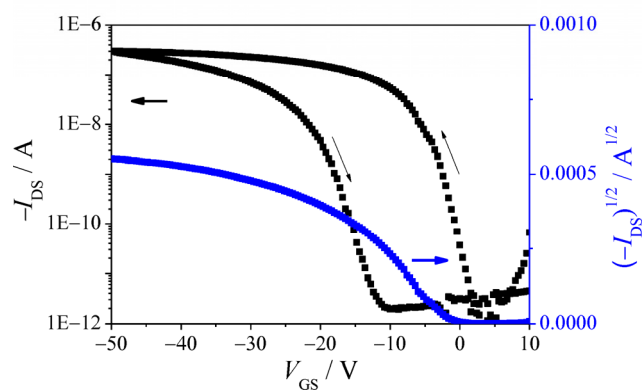

**Fig. S7.** Optical microscopy image and corresponding transfer characteristic of SCFET device #21.

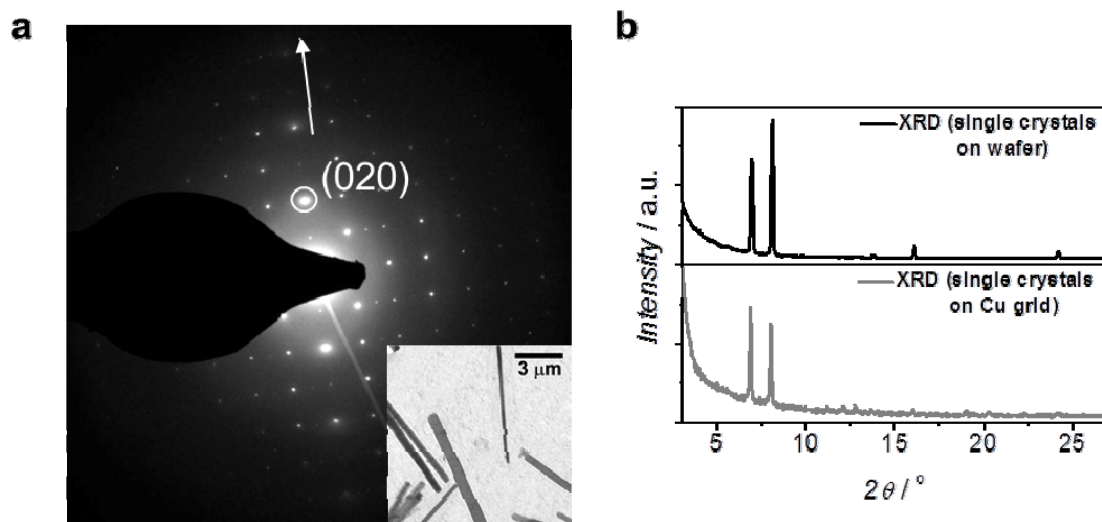

**Fig. S8.** (a) SAED pattern of a single crystal of merocyanine dye **1** with indicated direction of crystal elongation as white arrow (inset: transmission electron microscopy image of single crystals of dye **1** used for SAED experiments). (b) XRD pattern of single crystals of merocyanine dye **1** on a copper grid used for SAED measurements in comparison to the XRD pattern of the single crystals of merocyanine dye **1** on the TPA modified Si/SiO<sub>2</sub>/AlO<sub>x</sub> substrate.



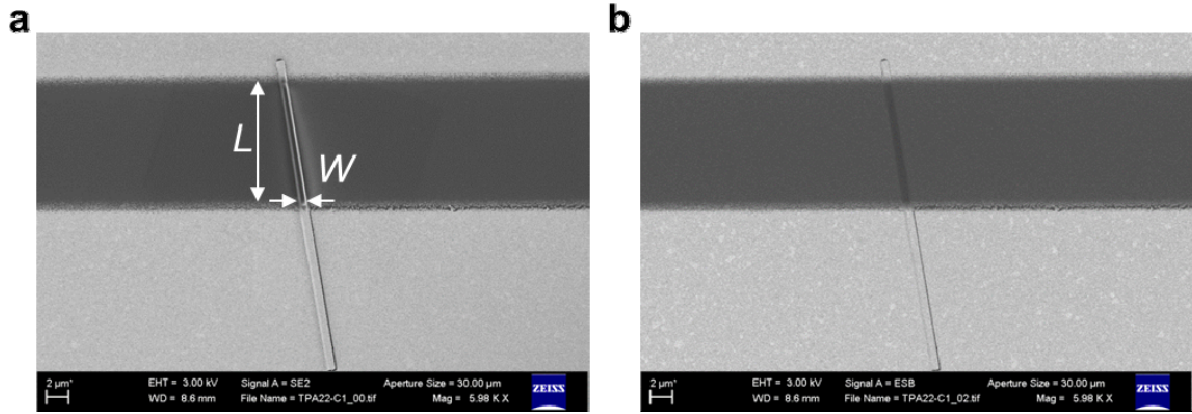

**Fig. S9.** SEM images of representative device obtained with secondary electron detector (a) and backscattered electron detector (b) for conservative determination of the device dimensions as indicated in (a).

**Tab. S1.** Channel length ( $L$ ), channel width ( $W$ ), crystal thickness ( $d$ ), charge carrier mobility ( $\mu$ ), threshold voltage ( $V_T$ ) and current on/off ratio ( $I_{on}/I_{off}$ ) of all fabricated SCFETs of merocyanine dye **1**.

| #         | $L$<br>/ $\mu\text{m}$ | $W$<br>/ $\mu\text{m}$ | $d$<br>/ nm | $\mu$<br>/ $\text{cm}^2 \text{V}^{-1} \text{s}^{-1}$ | $V_T$<br>/ V | $I_{on}/I_{off}$ |
|-----------|------------------------|------------------------|-------------|------------------------------------------------------|--------------|------------------|
| <b>1</b>  | 23.4                   | 1.7                    | 195         | 1.38                                                 | 0            | $2 \cdot 10^5$   |
| <b>2</b>  | 12.4                   | 2.0                    | 170         | 0.56                                                 | -1           | $5 \cdot 10^4$   |
| <b>3</b>  | 25.1                   | 0.2                    | 49          | 0.22                                                 | -3           | $2 \cdot 10^3$   |
| <b>4</b>  | 23.2                   | 1.9                    | 75          | 1.03                                                 | 0            | $2 \cdot 10^4$   |
| <b>5</b>  | 10.5                   | 0.2                    | 64          | 0.42                                                 | -6           | $6 \cdot 10^3$   |
| <b>6</b>  | 9.6                    | 1.0                    | 145         | 0.37                                                 | -6           | $3 \cdot 10^4$   |
| <b>7</b>  | 9.6                    | 1.6                    | 930         | 0.33                                                 | -1           | $8 \cdot 10^3$   |
| <b>8</b>  | 7.4                    | 1.1                    | 658         | 0.26                                                 | -2           | $1 \cdot 10^4$   |
| <b>9</b>  | 9.0                    | 0.4                    | 103         | 1.45                                                 | -2           | $2 \cdot 10^4$   |
| <b>10</b> | 12.9                   | 1.1                    | 730         | 0.26                                                 | -5           | $2 \cdot 10^4$   |
| <b>11</b> | 13.4                   | 0.6                    | 169         | 0.84                                                 | 0            | $5 \cdot 10^4$   |
| <b>12</b> | 11.1                   | 1.7                    | 742         | 0.41                                                 | -3           | $4 \cdot 10^4$   |
| <b>13</b> | 11.0                   | 0.8                    | 394         | 0.82                                                 | -4           | $9 \cdot 10^4$   |
| <b>14</b> | 13.0                   | 1.0                    | 313         | 1.47                                                 | -3           | $3 \cdot 10^5$   |
| <b>15</b> | 10.5                   | 0.4                    | 128         | 2.34                                                 | -3           | $4 \cdot 10^5$   |
| <b>16</b> | 12.0                   | 0.6                    | 319         | 0.83                                                 | -13          | $2 \cdot 10^5$   |
| <b>17</b> | 10.2                   | 0.5                    | 203         | 0.69                                                 | -9           | $1 \cdot 10^4$   |
| <b>18</b> | 11.2                   | 0.4                    | 104         | 1.74                                                 | -2           | $2 \cdot 10^5$   |
| <b>19</b> | 3.8                    | 0.3                    | 87          | 0.95                                                 | 0            | $2 \cdot 10^4$   |
| <b>20</b> | 8.1                    | 1.4                    | 637         | 0.11                                                 | -3           | $3 \cdot 10^4$   |
| <b>21</b> | 10.3                   | 0.3                    | 77          | 1.72                                                 | -2           | $3 \cdot 10^5$   |
| <b>22</b> | 11.9                   | 1.1                    | 818         | no field effect                                      |              |                  |

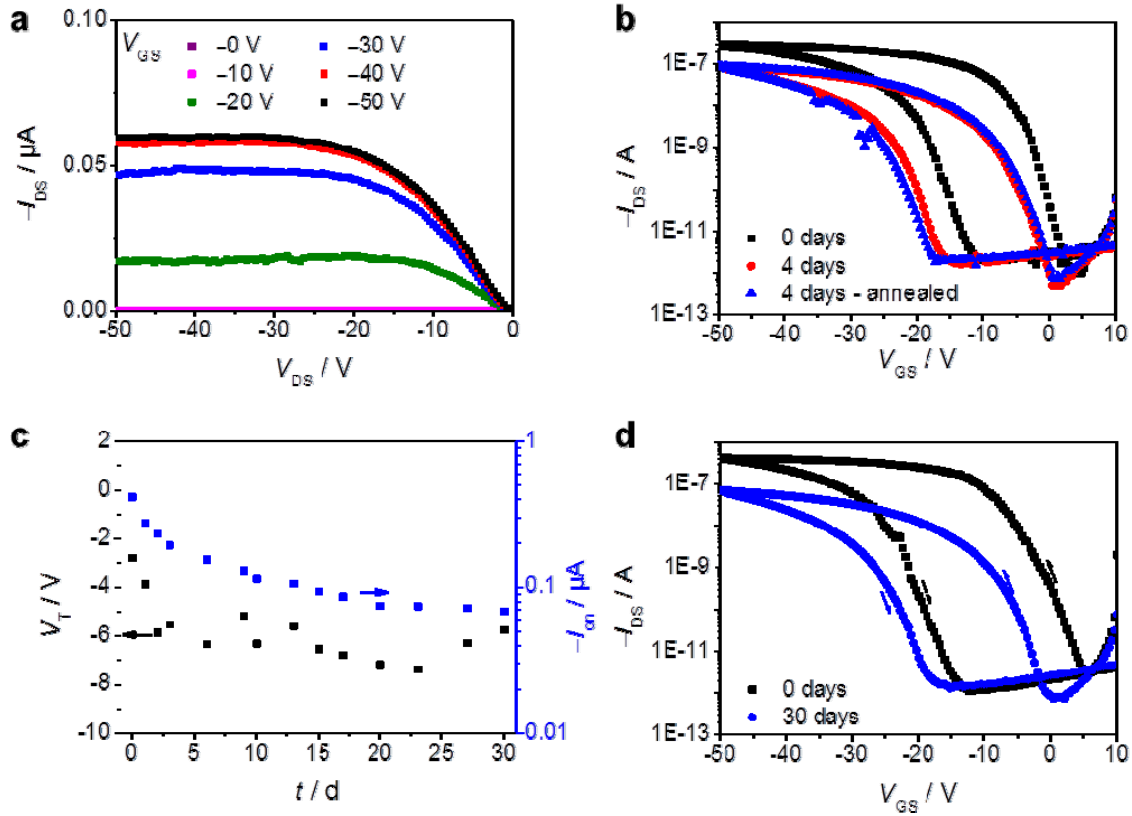

**Fig. S10.** (a) Output curve of device #15. (b) Transfer characteristics of device #21 as measured after fabrication (0 days), after 4 days in air as well as after 4 days in air and vacuum annealing for 2 h at 100 °C. (c) Development of threshold voltage and on-current of device #15 over 30 days in air. (d) Transfer characteristics of device #15 as measured directly after fabrication and after keeping the device for 30 days in air.

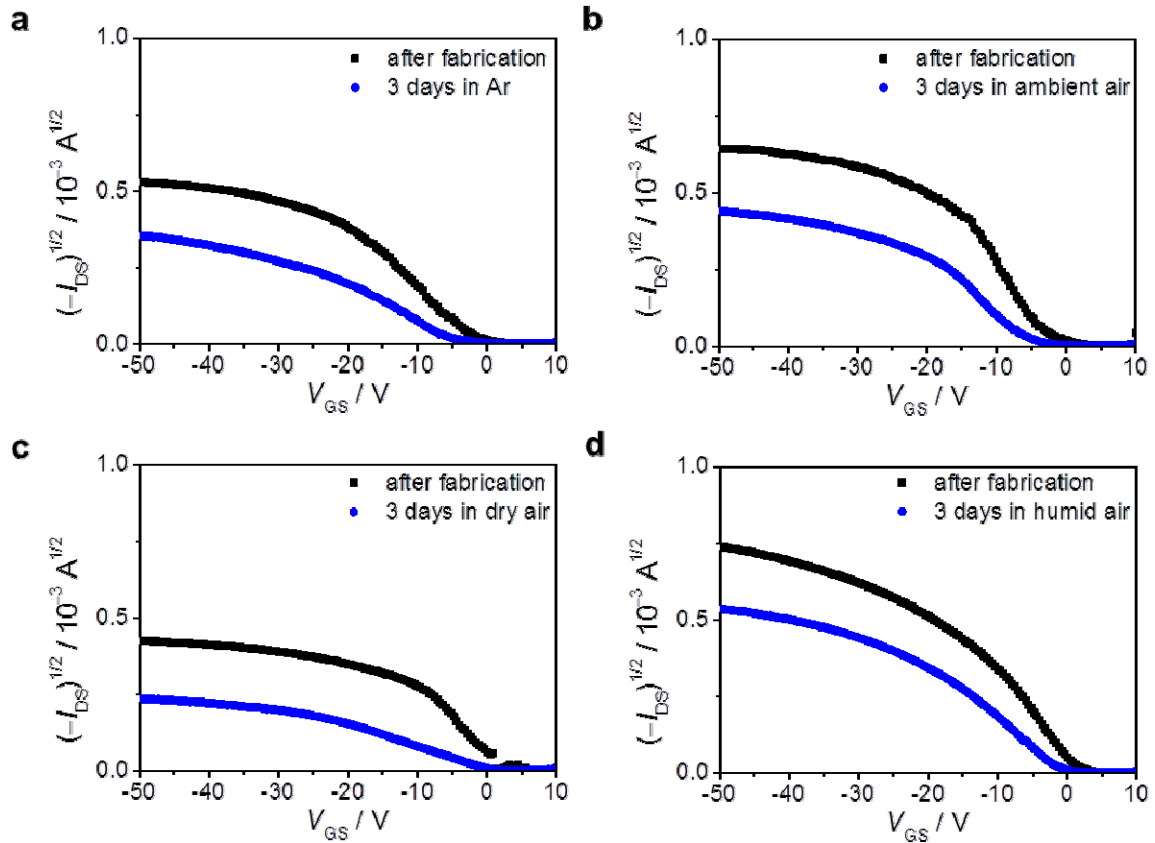

**Fig. S11.** Square root of the drain-source current of different devices after fabrication as well as after storage for 3 days in Argon (a), ambient air (b), dry air (c) as well as air with 100 % relative humidity (d).

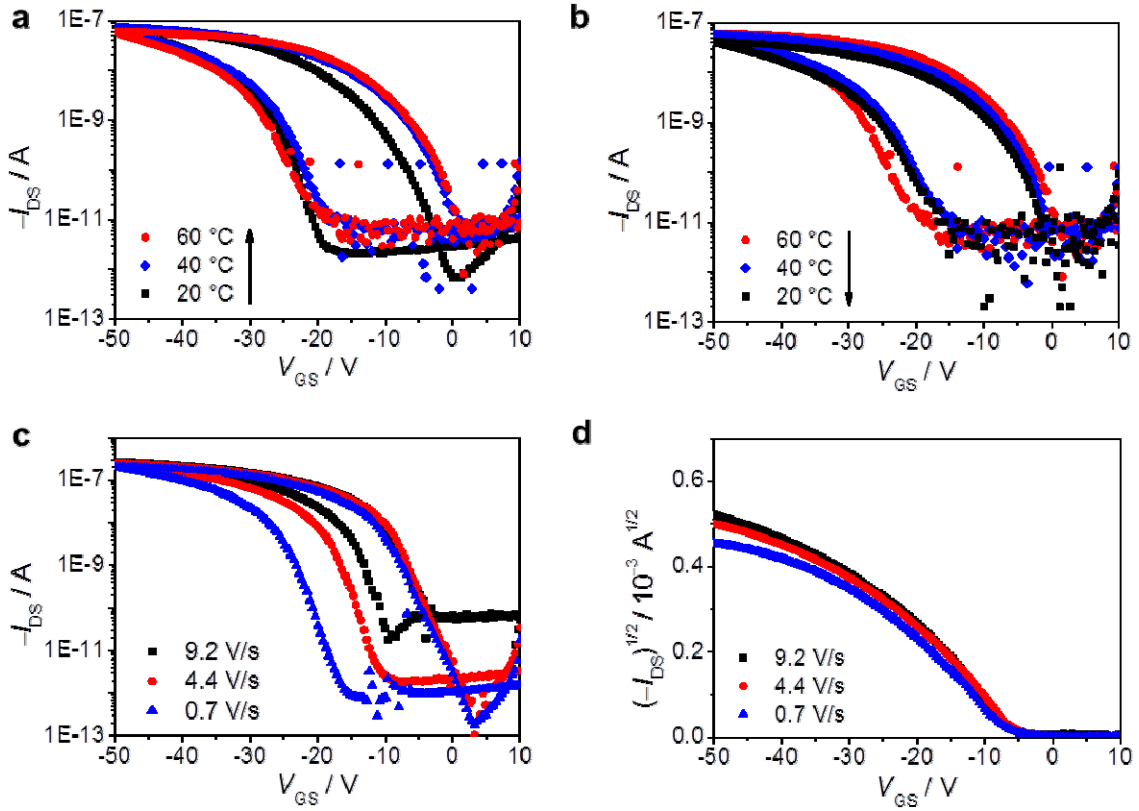

**Fig. S12.** (a) Transfer characteristics of device #21 measured at different device temperatures upon heating of the device. (b) Transfer characteristics of device #21 measured at different device temperatures upon cooling of the device. (c) Transfer characteristics of device #21 for different sweep rates. (d) Corresponding plot of the square root of the drain-source current of device #21 for different sweep rates.

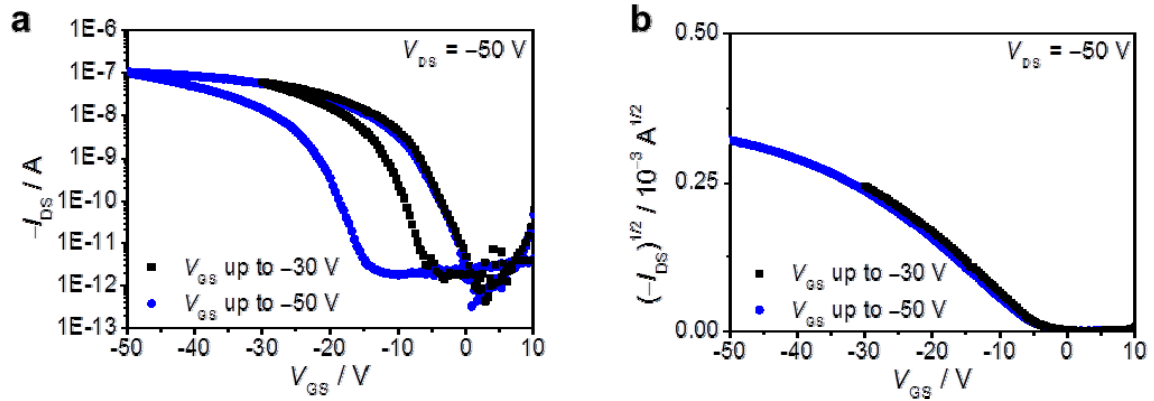

**Fig. S13.** Transfer characteristics (a) as well as corresponding plot of the square root of the drain-source current (b) of representative device measured at a drain-source voltage of  $V_{DS} = -50$  V from  $V_{GS} = 10$  V up to  $V_{GS} = -30$  V (black squares) and  $V_{GS} = -50$  V (blue circles).



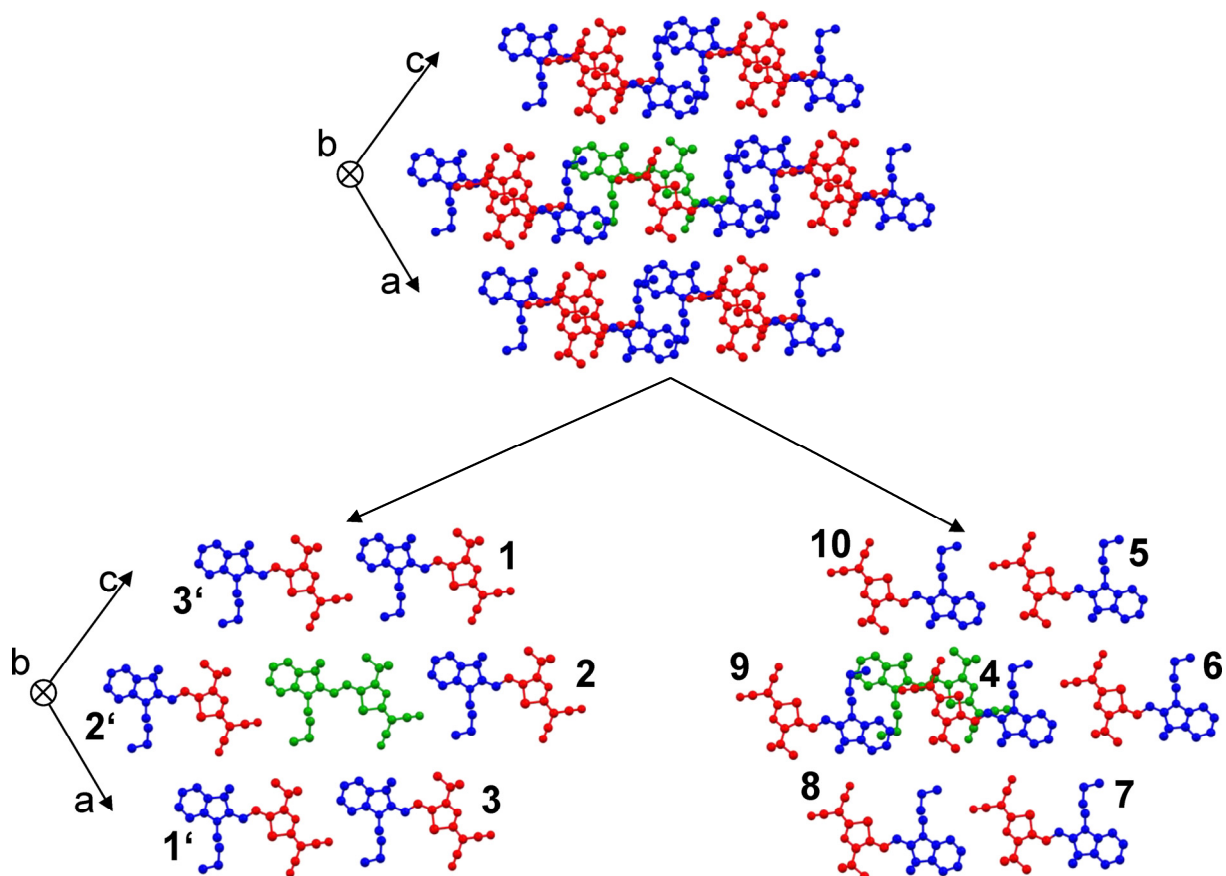

**Fig. S14.** Numeration of the next neighboring molecules around the central molecule (colored in green). The transfer integrals were calculated for the molecular pairs of the central molecule with a numbered molecule.

**Tab. S2.** Calculated transfer integrals  $t$  of central molecule with next neighboring molecule.

| Next neighboring molecule | $ t $<br>/ meV |
|---------------------------|----------------|
| 1/1'                      | 0              |
| 2/2'                      | 8              |
| 3/3'                      | 9              |
| 4                         | 15             |
| 5                         | 0              |
| 6                         | 0              |
| 7                         | 0              |
| 8                         | 0              |
| 9                         | 0              |
| 10                        | 0              |
